# Supplementary material for: Liraglutide + PYY3-36 Combination Therapy Mimics Effects of Roux-en-Y Bypass on Early NAFLD Whilst Lacking-Behind in Metabolic Improvements
Source: MDPI journal article supplement (doi:10.3390/jcm11030753), 2022-01-30
Supplement: s1 [file s1]

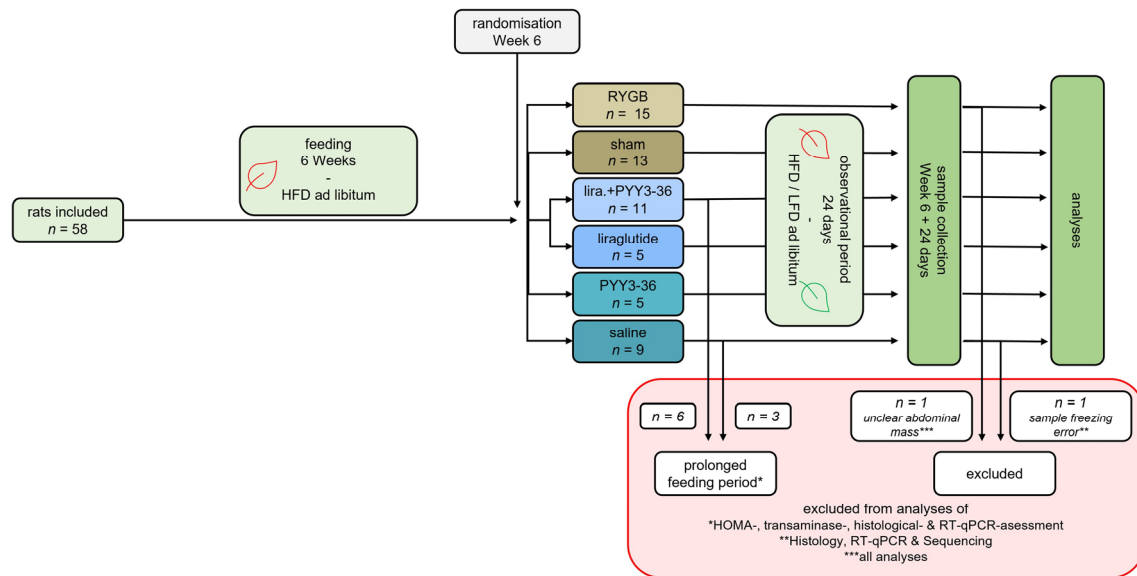

**Supplementary Figure S1** | Schematic representation of the study groups, interventions and exclusion causes
